# Supplementary material for: BIG Modulates Stem Cell Niche and Meristem Development via SCR/SHR Pathway in Arabidopsis Roots
Source: MDPI journal article supplement (doi:10.3390/ijms23126784), 2022-06-17
Supplement: s1 [file s1]

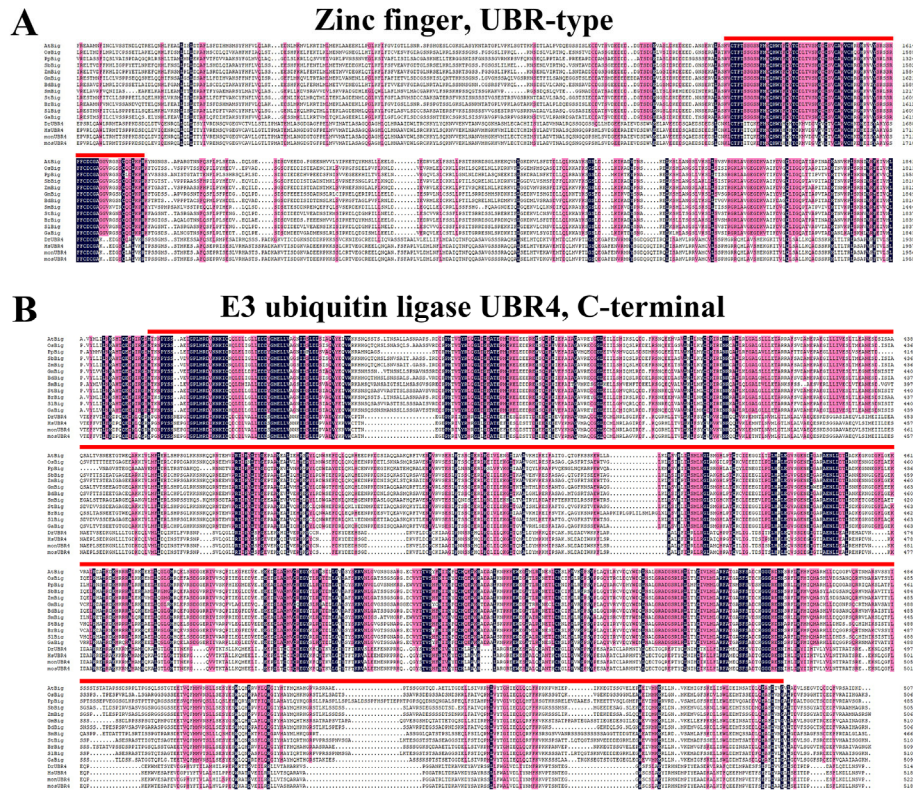

**Figure S2:** The highly conserved Arabidopsis BIG. (A) Alignment of BIG proteins among different species. Identical amino acids are indicated in the same color. The red line represents the conserved UBR domain and E3 ubiquitin ligase domain.

**Table S1. Primers used in this study.**

| Name      | Sequences (5'-3')         |
|-----------|---------------------------|
| WOX5-q-FP | GATTGTCAAGAGGAAGAGAAGGTGA |
| WOX5-q-RP | AGCTTAATCGAAGATCTAATGGCG  |
| SHR-q-FP  | TCCAAGGACGAGCAACGAGAGGT   |
| SHR-q-RP  | CCGGCGGCATCAGGACACT       |
| SCR-q-FP  | TTCCCGCCGTCCAAACAAATA     |
| SCR-q-RP  | TGCGCTGAGGTCCCCTAAGG      |
| PLT1-q-FP | ACATCGATGGACTGGTCGATATGAG |
| PLT1-q-RP | TGAAGGACCCCAGTACTTAAGTGCA |
| PLT2-q-FP | TACCTTATAACGACATTCATCAA   |
| PLT2-q-RP | GAGCATTAGAGGCACAAG        |
| PIN1-q-FP | TTACTGTTTCGTCGTTCTA       |
| PIN1-q-RP | TATATCTCAGCGTTGGTTA       |
| PIN2-q-FP | GAAGAATGCTATGACCAGAG      |
| PIN2-q-RP | TTGTCGTGAGGAGGAATA        |
| PIN3-q-FP | TTCGGAGGAGAACAACAA        |
| PIN3-q-RP | TGGAATTGGAGCAAGTTT        |

|                     |                      |
|---------------------|----------------------|
| <i>PIN7</i> -q-FP   | GAGAATCATCATCATGTAGG |
| <i>PIN7</i> -q-RP   | GGCTCCATTATCAACTTG   |
| <i>Actin7</i> -q-FP | CCATTCAGGCCGTTCTTTC  |
| <i>Actin7</i> -q-RP | CGTTCTGCGGTAGTGGTGA  |
